# Supplementary material for: In Operando analysis of the charge storage mechanism in a conversion ZnCo2O4 anode and the application in flexible Li-ion batteries
Source: Royal Society of Chemistry journal article supplement (doi:10.1039/c9qi00356h), 2019-01-01
Supplement: c9qi00356h1.pdf [file c9qi00356h1.pdf]

## Supporting information

### ***In operando* Analysis of the Charge Storage Mechanism in Conversion ZnCo<sub>2</sub>O<sub>4</sub> Anode and the Application in Flexible Li-ion Batteries**

Zijian Zhao<sup>a</sup>, Guiying Tian<sup>a</sup>, Vanessa Trouillet<sup>a, b</sup>, Lihua Zhu<sup>a</sup>, Jiangong Zhu<sup>a</sup>, Aleksandr Missiul<sup>c</sup>, Edmund Welter<sup>d</sup>  
and Sonia Dsoke<sup>a, e \*</sup>

<sup>a</sup>Institute for Applied Materials (IAM), Karlsruhe Institute of Technology (KIT), Hermann-von-Helmholtz-Platz 1, 76344 Eggenstein-Leopoldshafen, Germany

<sup>b</sup>Karlsruhe Nano Micro Facility (KNMF), Karlsruhe Institute of Technology (KIT), 76344, Eggenstein-Leopoldshafen, Germany

<sup>c</sup>CELLS-ALBA, Carrer de la Llum 2-26, 08290 Cerdanyola del Vallès, Barcelona, Spain

<sup>d</sup>Deutsches Elektronen-Synchrotron DESY, Notkestrasse 85, D-22607 Hamburg, Germany

<sup>e</sup>Helmholtz-Institute Ulm for Electrochemical Energy Storage (HIU), Helmholtzstrasse 11, 89081 Ulm, Germany

---

\* Corresponding author: Tel.: +49 721 608 41915 *E-mail address*: sonia.dsoke@kit.edu (S. Dsoke)

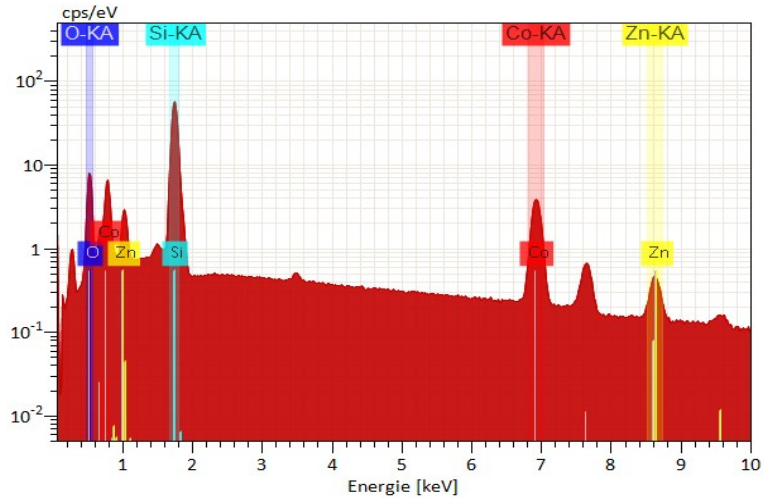

Fig. S1 EDS spectrum of the ZCO (Si corresponds to the sample holder).

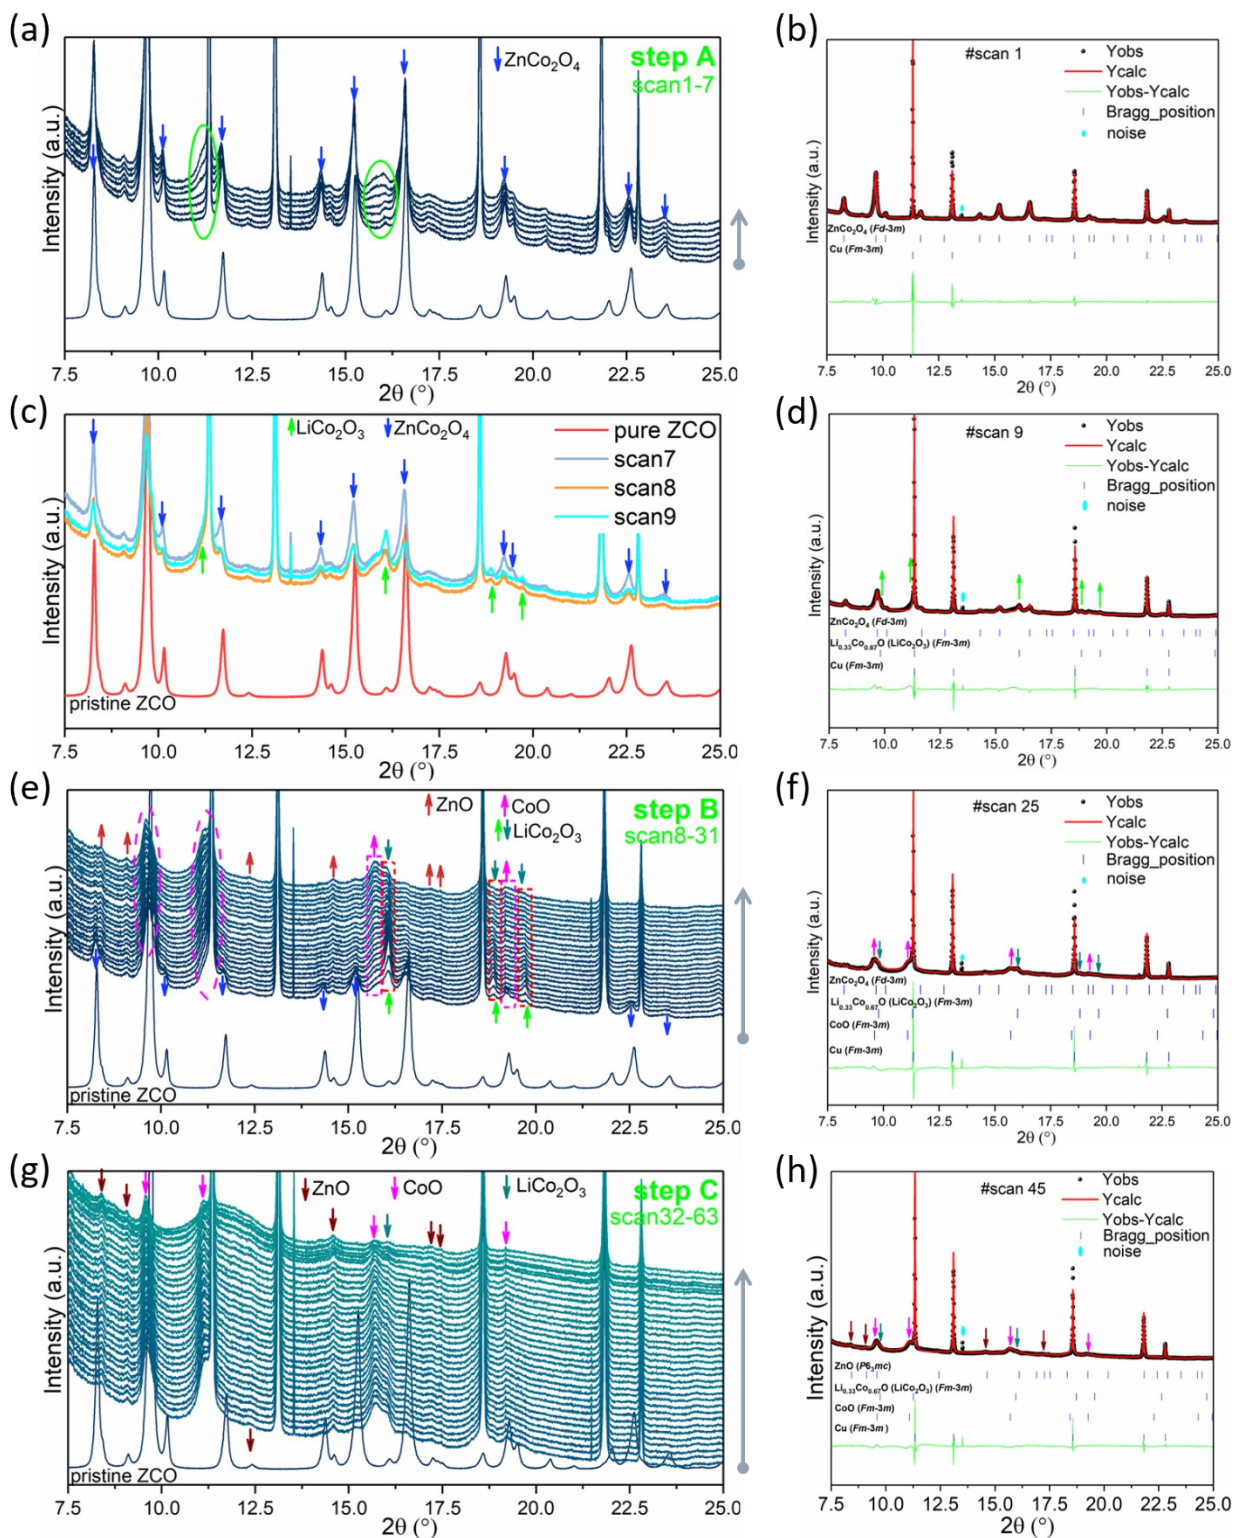

Fig. S2 Evolution of the operando SRD patterns of the ZCO electrode: step A (a, b), step A+B (c, d), step B (e, f) and step C (g, h).

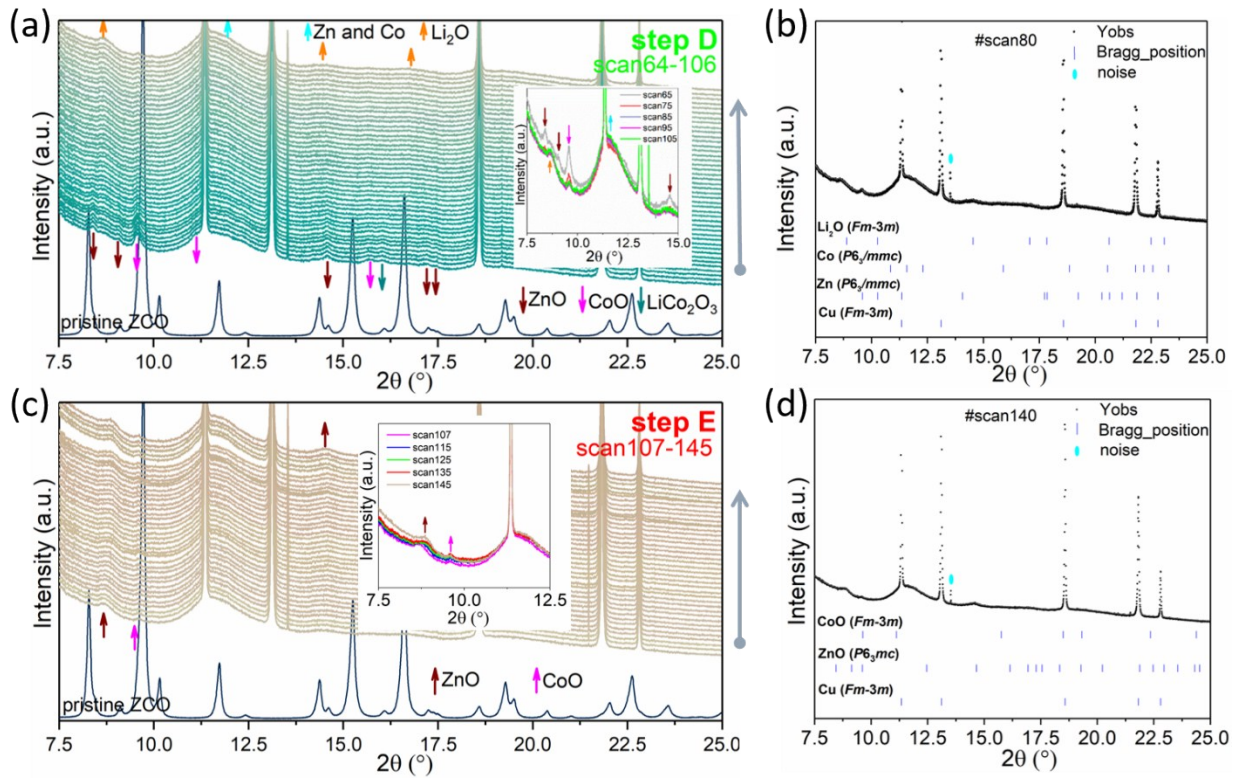

Fig. S3 Evolution of the operando SRD patterns: step D (a, b) and step E (c, d).

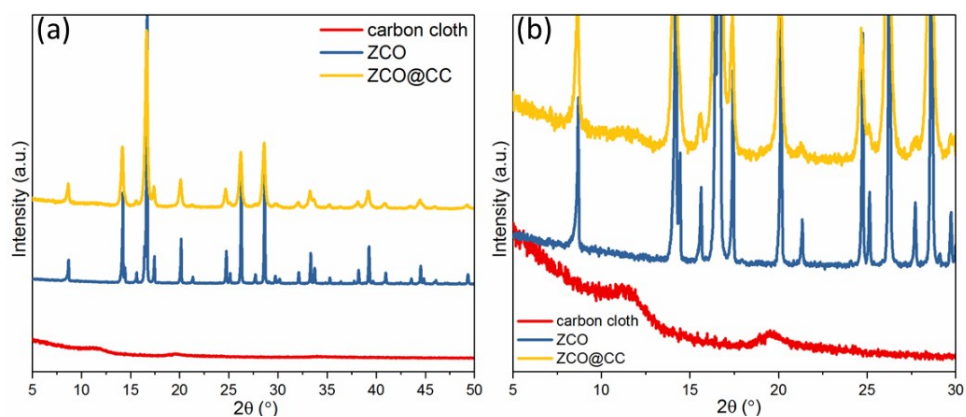

Fig. S4 XRD patterns (Mo  $K_{\alpha 1}$ ) of the CC, ZCO and ZCO/CC.

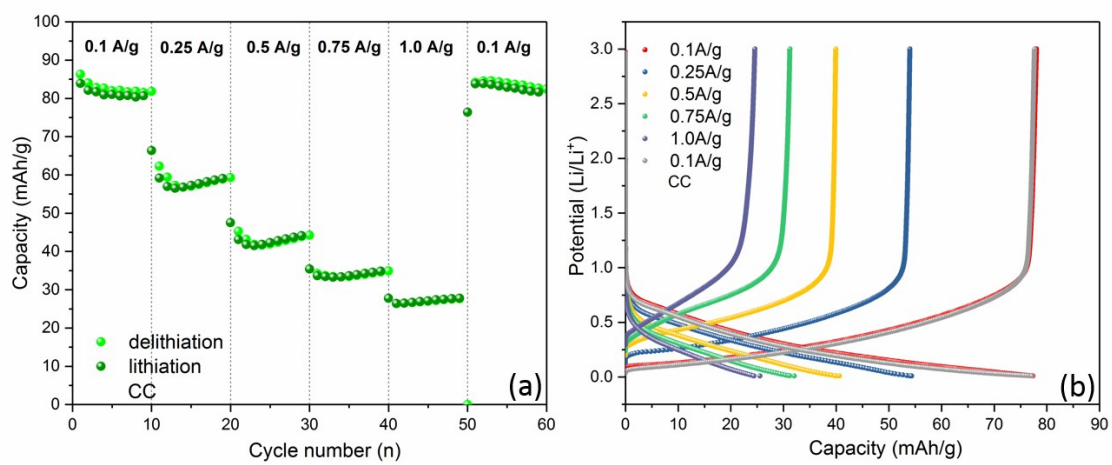

Fig. S5 Electrochemical performance of the CC: (a) GC specific capacity and (b) potential profiles at different current densities.

Table S1 Peak currents of the CVs of the ZCO and the ZCO@CC at different scan rates, and corresponding Li<sup>+</sup> diffusion parameter ( $AD_{Li}^{1/2}$ )

| scan rate (V/s) <sup>1/2</sup>                       | ZCO anodic (A)        | ZCO cathodic (A)      | ZCO@CC anodic (A)     | ZCO@CC cathodic (A)   |
|------------------------------------------------------|-----------------------|-----------------------|-----------------------|-----------------------|
| 0.01                                                 | 0.000287              | -0.00059              | 0.000479              | -0.00078              |
| 0.015811                                             | 0.000788              | -0.00175              | 0.001101              | -0.00178              |
| 0.022361                                             | 0.001258              | -0.00252              | 0.002288              | -0.00368              |
| 0.027386                                             | 0.002274              | -0.00419              | 0.002649              | -0.00433              |
| 0.031623                                             | 0.003675              | -0.00567              | 0.004627              | -0.00698              |
| fitted slope                                         | 0.14686               | -0.22622              | 0.17636               | -0.26879              |
| $AD_{Li}^{1/2}$ (cm <sup>3</sup> /s <sup>1/2</sup> ) | $2.48 \times 10^{-7}$ | $3.81 \times 10^{-7}$ | $2.97 \times 10^{-7}$ | $4.53 \times 10^{-7}$ |

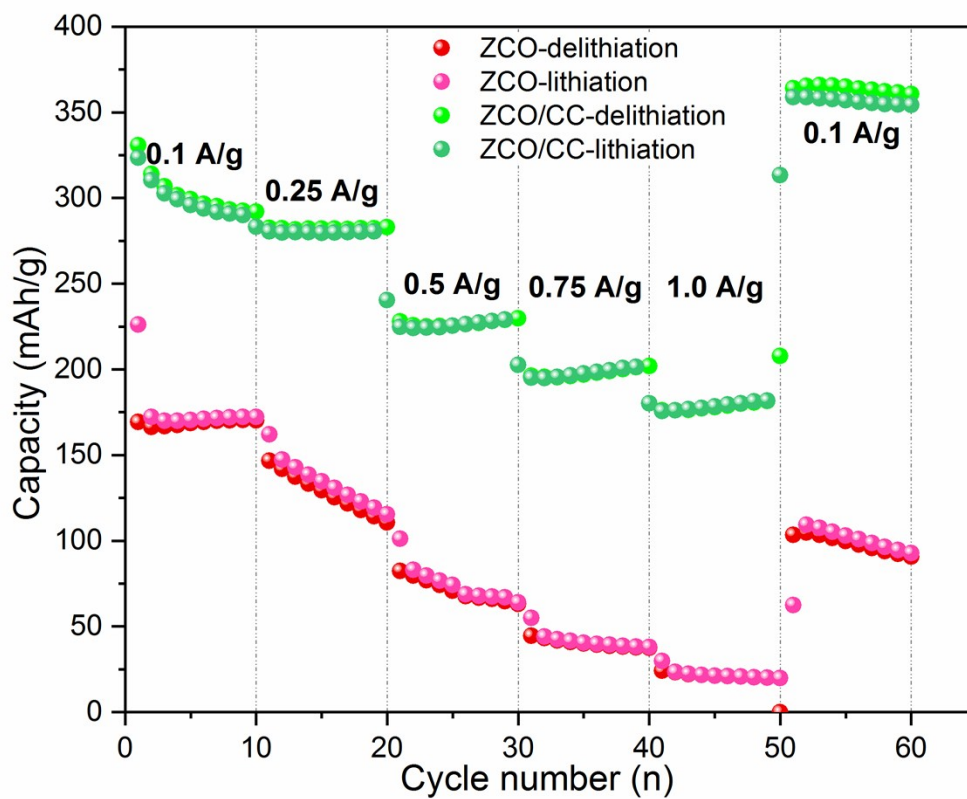

Fig. S6 Rate capability of the ZCO and the ZCO/CC based on the apparent specific capacity calculated from the whole electrode (including all electrode parts).
